# Supplementary material
Source: publisher figshare collection journal article supplement (https://acs.figshare.com/ndownloader/files/15314972)
Supplement: Supplementary file 1 [file 15314972]

Compound_ID	SMILES	DCN1-UBE2M IC50-FP	DCN1-UBE2M IC50-HTRF	IC50 against KYSE70 £¨uM)	IC50 against PC9£¨uM)	IC50 against SMMC-7721£¨uM)	IC50 against PC3£¨uM)	IC50 against MCF7£¨uM)
6	C#CCSC1=NC(SC2=NN=NN2C)=C(C#N)C(C3=CC=C(OC(C=C4)=O)C4=C3)=N1	1.25 ¡À 0.08¦ÌM	0.82¡À0.01¦ÌM
7	C#CCSC1=NC(SC2=NN=NN2C)=C(C#N)C(C3=CC=CS3)=N1	> 20¦ÌM	>10¦ÌM
8	C#CCSC1=NC(SC2=NN=NN2C)=C(C#N)C(C3=CNC4C3C=CC=C4)=N1	> 20¦ÌM	>10¦ÌM
9	C#CCSC1=NC(SC2=NN=NN2C)=C(C#N)C(C3=CC=CN3)=N1	> 20¦ÌM	>10¦ÌM
10	C#CCSC1=NC(SC2=NN=NN2C)=C(C#N)C(C3=CC(OC)=C(OC)C(OC)=C3)=N1	0.36 ¡À 0.01¦ÌM	0.25¡À0.01¦ÌM
11	C#CCSC1=NC(SC2=NN=NN2C)=C(C#N)C(C3=CC=C(Cl)C=C3)=N1	644.13 ¡À 8.38nM	290.65¡À2.31nM
12	C#CCSC1=NC(SC2=NN=NN2C)=C(C#N)C(C3=CC=CC(Cl)=C3)=N1	698.23 ¡À 6.48nM	281.65¡À2.45nM
13	C#CCSC1=NC(SC2=NN=NN2C)=C(C#N)C(C3=CC=C(Br)C=C3)=N1	64.75 ¡À 1.83nM	80.98¡À1.90nM
14	C#CCSC1=NC(SC2=NN=NN2C)=C(C#N)C(C3=CC=C(C)C=C3)=N1	1089.11 ¡À 2.99nM	368.76¡À2.22nM
15	C#CCSC1=NC(SC2=NN=NN2C)=C(C#N)C(C3=CC=C(C(C)C)C=C3)=N1	3149.34 ¡À 5.87nM	1015.10¡À3.00nM
16	C#CCSC1=NC(SC2=NN=NN2C)=C(C#N)C(C3=CC=C(OC)C=C3)=N1	942.93¡À6.93nM	338.83¡À2.53nM
17	C#CCSC1=NC(SC2=NN=NN2C)=C(C#N)C(C3=CC=C(Cl)C(Cl)=C3)=N1	78.49 ¡À 1.89nM	101.97¡À2.00nM
18	C#CCSC1=NC(SC2=NN=NN2C)=C(C#N)C(C3=CC=CC=C3)=N1	>20000nM	>20000nM	>20	>20	>20	>20	>20
19	C#CCSC1=NC(NC2=NN=NN2C)=C(C#N)C(C3=CC(OC)=C(OC)C(OC)=C3)=N1	>10000nM	>10000nM	>20	>20	>20	>20	>20
20	C#CCSC1=NC(N2CCNCC2)=C(C#N)C(C3=CC(OC)=C(OC)C(OC)=C3)=N1	>10000nM	>5000nM	>20	>20	>20	>20	>20
21	C#CCSC1=NC(N2CCSCC2)=C(C#N)C(C3=CC(OC)=C(OC)C(OC)=C3)=N1	>10000nM	>5000nM	>20	>20	>20	>20	>20
22	C#CCSC1=NC(N2CCOCC2)=C(C#N)C(C3=CC(OC)=C(OC)C(OC)=C3)=N1	>10000nM	>5000nM	>20	>20	>20	>20	>20
23	C#CCSC1=NC(N2CCCCC2)=C(C#N)C(C3=CC(OC)=C(OC)C(OC)=C3)=N1	>10000nM	>5000nM	>20	>20	>20	>20	>20
24	C#CCSC1=NC(NC2=CC=C(OC)C=C2)=C(C#N)C(C3=CC(OC)=C(OC)C(OC)=C3)=N1	>10000nM	>5000nM	>20	>20	>20	>20	>20
25	C#CCSC1=NC(NC2=CC=CC(C(F)(F)F)=C2)=C(C#N)C(C3=CC(OC)=C(OC)C(OC)=C3)=N1	>10000nM	>5000nM	>20	>20	>20	>20	>20
26	C#CCSC1=NC(SC2=NN=NN2CCN(C)C)=C(C#N)C(C3=CC(OC)=C(OC)C(OC)=C3)=N1	591.11¡À2.75nM	199.07¡À2.29nM
27	C#CCSC1=NC(SC2=NNC=N2)=C(C#N)C(C3=CC(OC)=C(OC)C(OC)=C3)=N1	>10000nM	>2500nM	>20	>20	>20	>20	>20
28	C#CCSC1=NC(SC2=NC=CN2C)=C(C#N)C(C3=CC(OC)=C(OC)C(OC)=C3)=N1	1217.90¡À1.32nM	>5000nM
29	C#CCSC1=NC(SC2=NC=CC=C2)=C(C#N)C(C3=CC(OC)=C(OC)C(OC)=C3)=N1	>10000nM	>2500nM	>10	>20	>20	>10	>10
30	C#CCSC1=NC(SC2=CC=C(N)S2)=C(C#N)C(C3=CC(OC)=C(OC)C(OC)=C3)=N1	413.55 ¡À 2.04nM	141.22¡À2.15nM
31	C#CCSC1=NC(SC2=NN=C(C)S2)=C(C#N)C(C3=CC(OC)=C(OC)C(OC)=C3)=N1	152.82 ¡À 2.18nM	133.60¡À2.12nM
32	C#CCSC1=NC(SC2=NN=C(N)S2)=C(C#N)C(C3=CC(OC)=C(OC)C(OC)=C3)=N1	820.78 ¡À 2.91nM	106.73¡À2.02nM
33	C#CCSC1=NC(SC2=NN=CS2)=C(C#N)C(C3=CC(OC)=C(OC)C(OC)=C3)=N1	195.66 ¡À 2.29nM	65.98¡À1.81nM	8.25¡À0.91	7.96¡À0.90	4.66¡À0.66	10.28¡À1.01	9.82¡À0.99
34	C#CCSC1=NC(SC2=NC=CS2)=C(C#N)C(C3=CC(OC)=C(OC)C(OC)=C3)=N1	141.22 ¡À 2.10nM	77.04¡À1.88nM
35	C#CCSC1=NC(SC2=NC(C)=CS2)=C(C#N)C(C3=CC(OC)=C(OC)C(OC)=C3)=N1	>10000nM	>10000nM	>20	>20	>20	>20	>20
36	C#CCSC1=NC(SC2=NC(C)=C(C)S2)=C(C#N)C(C3=CC(OC)=C(OC)C(OC)=C3)=N1	>10000nM	>10000nM	>20	>20	>20	>20	>20
37	C#CCSC1=NC(SC2=NC3=C(C=CC=C3)S2)=C(C#N)C(C4=CC(OC)=C(OC)C(OC)=C4)=N1	>10000nM	>5000nM	>20	>20	>20	>20	>20
38	C#CCSC1=NC(SC2=NC=CS2)=C(C#N)C(C3=CC=CC(Cl)=C3)=N1	361.69 ¡À 2.93nM	140.38¡À2.14nM
39	C#CCSC1=NC(SC2=NC=CS2)=C(C#N)C(C3=CC=C(Cl)C=C3)=N1	36.59 ¡À 0.18nM	96.05¡À1.98nM	5.35¡À0.72	4.13¡À0.61	6.04¡À0.78	3.62¡À0.55	3.23¡À0.51
40	C#CCSC1=NC(SC2=NC=CS2)=C(C#N)C(C3=CC=C(Br)C=C3)=N1	551.87 ¡À 1.71nM	189.41¡À1.95nM	10.88¡À1.03	12.11¡À1.08	3.99¡À0.60	8.53¡À0.93	11.63¡À1.06
41	C#CCSC1=NC(SC2=NC=CS2)=C(C#N)C(C3=CC=C(Cl)C(Cl)=C3)=N1	62.99 ¡À 1.79nM	112.26¡À2.05nM
42	C#CCSC1=NC(SC2=NC=CS2)=C(C#N)C(C3=CC=C(C)C=C3)=N1	26.89 ¡À 0.24nM	15.71¡À1.19nM	4.30¡À0.63	1.11¡À0.04	2.45¡À0.39	1.62¡À0.32	2.20¡À0.34
43	C#CCSC1=NC(SC2=NC=CS2)=C(C#N)C(C3=CC=C(OC(C=C4)=O)C4=C3)=N1	789.09 ¡À 2. 89nM	202.05¡À2.00nM
44	C#CCSC1=NC(SC2=NC=CS2)=C(C#N)C(C3=CC=NC=C3)=N1	1482.32 ¡À 1.39nM	1064.73¡À1.07nM
45	C#CCSC1=NC(SC2=NC=CS2)=C(C#N)C(C3=CC=CN3)=N1	>20000nM	>10000nM	>20	>20	>20	>20	>20
46	C#CCSC1=NC(SC2=NN=NN2CCN(C)C)=C(C#N)C(C3=CC=C(Cl)C=C3)=N1	63.51 ¡À 1.80nM	122.65¡À2.08nM	6.56¡À0.81	5.30¡À0.72	7.34¡À0.86	7.17¡À0.85	6.18¡À0.79
47	C#CCSC1=NC(SC2=NN=NN2CCN(C)C)=C(C#N)C(C3=CC=CC(Cl)=C3)=N1	106.21 ¡À 2.02nM	379.91¡À2.58nM	5.32¡À0.72	6.48¡À0.81	8.64¡À0.93	3.54¡À0.55	4.12¡À0.61
48	C#CCSC1=NC(SC2=NN=NN2CCN(C)C)=C(C#N)C(C3=CC=C(C)C=C3)=N1	390.85 ¡À 2.56nM	172.29¡À2.23nM
49	C#CCSC1=NC(SC2=NN=NN2CCN(C)C)=C(C#N)C(C3=CC=C(Cl)C(Cl)=C3)=N1	109.04 ¡À 2.03nM	119.80¡À2.07nM
50	C#CCSC1=NC(SC2=NN=NN2CCN(C)C)=C(C#N)C(C3=CC=C(OC(C=C4)=O)C4=C3)=N1	665.64 ¡À 2.74nM	814.60¡À2.91nM
51	C=CCSC1=NC(SC2=NC=CS2)=C(C#N)C(C3=CC=C(Cl)C=C3)=N1	> 10000nM	> 10000nM
52	ClC(C=C1)=CC=C1C2=NC(SCCC)=NC(SC3=NC=CS3)=C2C#N	> 10000nM	> 10000nM
54	ClC(C=C1)=CC=C1C2=NC(SCC3=CN(CC4=CC=CC=C4)N=N3)=NC(SC5=NC=CS5)=C2C#N	> 10000nM	> 10000nM
